# Supplementary material for: Identification of Key Ubiquitination Sites Involved in the Proteasomal Degradation of AtACS7 in Arabidopsis
Source: MDPI journal article supplement (doi:10.3390/ijms25052931), 2024-03-02
Supplement: s1 [file s1]

**Supplementary Table S1.** Primers used to generate constructs. The underlined sequences in primers show introduced restriction enzyme sites. Mutation sites are highlighted in red.

| Primers used to generate constructs      |                          |                                     |
|------------------------------------------|--------------------------|-------------------------------------|
| Construct                                | Primers                  | Sequence (5' to 3')                 |
| <i>MBP-ACS7-His</i>                      | MBP-ACS7-                | CACATATGTCCATGGG <u>CGGCCG</u> CATG |
|                                          | His-F                    | GGTCTTCCTCTAATGAT                   |
|                                          | MBP-ACS7-                | CTGCAGGGAATTCGTGATGATGATGA          |
|                                          | His-R                    | TGATGAAACCTCCTTCGTCG                |
| <i>MBP-ACS7<sup>K285RK366R</sup>-His</i> | ACS7 <sup>K285R</sup> -F | AGTCTCTCCAGGATCTTGGTCTTCC           |
|                                          |                          | TGGT                                |
|                                          | ACS7 <sup>K285R</sup> -R | ACCAAGATCCCTGGAGAGACTGTAG           |
|                                          |                          | ACGAT                               |
|                                          | ACS7 <sup>K366R</sup> -F | GAGTGTTTGAGAGGGAACGCAGGGC           |
|                                          |                          | TATTT                               |
|                                          | ACS7 <sup>K366R</sup> -R | TGCGTTCCCTCTCAAACACTCAATCC          |
|                                          |                          | CTGC                                |
